# Supplementary material for: Unraveling the Role of Molecular Profiling in Predicting Treatment Response in Stage III Colorectal Cancer Patients: Insights from the IDEA International Study
Source: MDPI journal article supplement (doi:10.3390/cancers15194819), 2023-09-30
Supplement: s1 [file s1]

**Supplementary Table S2.** Gene panel for colorectal cancer (CRC) based on Kyoto Encyclopedia of Genes and Genomes (KEGG).

| Gene          | Chromosome | Location Based on GRCh37.p13 |           | Source<br>[ <a href="https://www.ensembl.org/index.html">https://www.ensembl.org/index.html</a> ] |
|---------------|------------|------------------------------|-----------|---------------------------------------------------------------------------------------------------|
|               |            | Assembly<br>Start            | End       |                                                                                                   |
| <i>AKT1</i>   | 14         | 105235686                    | 105262085 | <a href="#">Ensembl:ENSG00000142208</a>                                                           |
| <i>AKT2</i>   | 19         | 40736224                     | 40791252  | <a href="#">Ensembl:ENSG00000105221</a>                                                           |
| <i>AKT3</i>   | 1          | 243651535                    | 244014381 | <a href="#">Ensembl:ENSG00000117020</a>                                                           |
| <i>APC</i>    | 5          | 112043195                    | 112181936 | <a href="#">Ensembl:ENSG00000134982</a>                                                           |
| <i>APC2</i>   | 19         | 1450120                      | 1473243   | <a href="#">Ensembl:ENSG00000115266</a>                                                           |
| <i>APPL1</i>  | 3          | 57261757                     | 57307499  | <a href="#">Ensembl:ENSG00000157500</a>                                                           |
| <i>ARAF</i>   | X          | 47420604                     | 47431307  | <a href="#">Ensembl:ENSG00000078061</a>                                                           |
| <i>AXIN1</i>  | 16         | 337440                       | 402723    | <a href="#">Ensembl:ENSG00000103126</a>                                                           |
| <i>AXIN2</i>  | 17         | 63524681                     | 63557766  | <a href="#">Ensembl:ENSG00000168646</a>                                                           |
| <i>BAD</i>    | 11         | 64037300                     | 64052176  | <a href="#">Ensembl:ENSG00000002330</a>                                                           |
| <i>BAX</i>    | 19         | 49458132                     | 49465055  | <a href="#">Ensembl:ENSG00000087088</a>                                                           |
| <i>BCL2</i>   | 18         | 60790579                     | 60987002  | <a href="#">Ensembl:ENSG00000171791</a>                                                           |
| <i>BIRC5</i>  | 17         | 76210334                     | 76221716  | <a href="#">Ensembl:ENSG00000089685</a>                                                           |
| <i>BRAF</i>   | 7          | 140413128                    | 140624729 | <a href="#">Ensembl:ENSG00000157764</a>                                                           |
| <i>CASP3</i>  | 4          | 185548850                    | 185570601 | <a href="#">Ensembl:ENSG00000164305</a>                                                           |
| <i>CASP9</i>  | 1          | 15817896                     | 15851285  | <a href="#">Ensembl:ENSG00000132906</a>                                                           |
| <i>CCND1</i>  | 11         | 69455924                     | 69469242  | <a href="#">Ensembl:ENSG00000110092</a>                                                           |
| <i>CTNNB1</i> | 3          | 41240996                     | 41281934  | <a href="#">Ensembl:ENSG00000168036</a>                                                           |
| <i>CYCS</i>   | 7          | 25158275                     | 25164879  | <a href="#">Ensembl:ENSG00000172115</a>                                                           |
| <i>DCC</i>    | 18         | 49866567                     | 51062269  | <a href="#">Ensembl:ENSG00000187323</a>                                                           |
| <i>FOS</i>    | 14         | 75745531                     | 75748933  | <a href="#">Ensembl:ENSG00000170345</a>                                                           |
| <i>GSK3B</i>  | 3          | 119540168                    | 119813294 | <a href="#">Ensembl:ENSG00000082701</a>                                                           |
| <i>JUN</i>    | 1          | 59246463                     | 59249719  | <a href="#">Ensembl:ENSG00000177606</a>                                                           |
| <i>KRAS</i>   | 12         | 25358180                     | 25403863  | <a href="#">Ensembl:ENSG00000133703</a>                                                           |
| <i>LEF1</i>   | 4          | 108968704                    | 109090088 | <a href="#">Ensembl:ENSG00000138795</a>                                                           |
| <i>MAP2K1</i> | 15         | 66679250                     | 66783882  | <a href="#">Ensembl:ENSG00000169032</a>                                                           |
| <i>MAPK1</i>  | 22         | 22113946                     | 22221970  | <a href="#">Ensembl:ENSG00000100030</a>                                                           |
| <i>MAPK10</i> | 4          | 86931558                     | 87374348  | <a href="#">Ensembl:ENSG00000109339</a>                                                           |
| <i>MAPK3</i>  | 16         | 30125426                     | 30134541  | <a href="#">Ensembl:ENSG00000102882</a>                                                           |
| <i>MAPK8</i>  | 10         | 49514720                     | 49647403  | <a href="#">Ensembl:ENSG00000107643</a>                                                           |
| <i>MAPK9</i>  | 5          | 179660143                    | 179719083 | <a href="#">Ensembl:ENSG00000050748</a>                                                           |
| <i>MLH1</i>   | 3          | 3703500                      | 37092337  | <a href="#">Ensembl:ENSG00000076242</a>                                                           |
| <i>MSH2</i>   | 2          | 47630206                     | 47710367  | <a href="#">Ensembl:ENSG00000095002</a>                                                           |
| <i>MSH3</i>   | 5          | 79950471                     | 80172634  | <a href="#">Ensembl:ENSG00000113318</a>                                                           |

|               |    |           |           |                                         |
|---------------|----|-----------|-----------|-----------------------------------------|
| <i>MSH6</i>   | 2  | 48010284  | 48034092  | <a href="#">Ensembl:ENSG00000116062</a> |
| <i>MYC</i>    | 8  | 128747680 | 128755197 | <a href="#">Ensembl:ENSG00000136997</a> |
| <i>PIK3CA</i> | 3  | 178866145 | 178957881 | <a href="#">Ensembl:ENSG00000121879</a> |
| <i>PIK3CB</i> | 3  | 138371540 | 138553770 | <a href="#">Ensembl:ENSG00000051382</a> |
| <i>PIK3CD</i> | 1  | 9711789   | 9789172   | <a href="#">Ensembl:ENSG00000171608</a> |
| <i>PIK3CG</i> | 7  | 106505727 | 106549425 | <a href="#">Ensembl:ENSG00000105851</a> |
| <i>PIK3R1</i> | 5  | 67511584  | 67597649  | <a href="#">Ensembl:ENSG00000145675</a> |
| <i>PIK3R2</i> | 19 | 18263973  | 18281342  | <a href="#">Ensembl:ENSG00000105647</a> |
| <i>PIK3R3</i> | 1  | 46505812  | 46640573  | <a href="#">Ensembl:ENSG00000117461</a> |
| <i>PIK3R5</i> | 17 | 8782233   | 8869024   | <a href="#">Ensembl:ENSG00000141506</a> |
| <i>RAC1</i>   | 7  | 6414158   | 6443598   | <a href="#">Ensembl:ENSG00000136238</a> |
| <i>RAC2</i>   | 22 | 37621310  | 37640309  | <a href="#">Ensembl:ENSG00000128340</a> |
| <i>RAC3</i>   | 17 | 79989554  | 79992080  | <a href="#">Ensembl:ENSG00000169750</a> |
| <i>RAF1</i>   | 3  | 12625100  | 12705616  | <a href="#">Ensembl:ENSG00000132155</a> |
| <i>RALGDS</i> | 9  | 135973109 | 136024597 | <a href="#">Ensembl:ENSG00000160271</a> |
| <i>RHOA</i>   | 3  | 49396578  | 49449409  | <a href="#">Ensembl:ENSG00000067560</a> |
| <i>SMAD2</i>  | 18 | 45335328  | 45457243  | <a href="#">Ensembl:ENSG00000175387</a> |
| <i>SMAD3</i>  | 15 | 67357940  | 67487507  | <a href="#">Ensembl:ENSG00000166949</a> |
| <i>SMAD4</i>  | 18 | 48556583  | 48611412  | <a href="#">Ensembl:ENSG00000141646</a> |
| <i>TCF7</i>   | 5  | 133450372 | 133483901 | <a href="#">Ensembl:ENSG00000081059</a> |
| <i>TCF7L1</i> | 2  | 85360515  | 85537510  | <a href="#">Ensembl:ENSG00000152284</a> |
| <i>TCF7L2</i> | 10 | 114710006 | 114927437 | <a href="#">Ensembl:ENSG00000148737</a> |
| <i>TGFB1</i>  | 19 | 41836228  | 41859827  | <a href="#">Ensembl:ENSG00000105329</a> |
| <i>TGFB2</i>  | 1  | 218518678 | 218617961 | <a href="#">Ensembl:ENSG00000092969</a> |
| <i>TGFB3</i>  | 14 | 76424440  | 76449354  | <a href="#">Ensembl:ENSG00000119699</a> |
| <i>TGFBR1</i> | 9  | 101867395 | 101916474 | <a href="#">Ensembl:ENSG00000106799</a> |
| <i>TGFBR2</i> | 3  | 30647994  | 30735634  | <a href="#">Ensembl:ENSG00000163513</a> |
| <i>TP53</i>   | 17 | 7571739   | 7590808   | <a href="#">Ensembl:ENSG00000141510</a> |

---
