# Supplementary material for: Unraveling the Role of Molecular Profiling in Predicting Treatment Response in Stage III Colorectal Cancer Patients: Insights from the IDEA International Study
Source: MDPI journal article supplement (doi:10.3390/cancers15194819), 2023-09-30
Supplement: s1 [file s1]

**Supplementary Table S3.** Signaling pathways and the associated genes for colorectal cancer (CRC) based on Kyoto Encyclopedia of Genes and Genomes (KEGG).

| Pathway                    | KEGG CRC Genes                                                                                                                                                                                         | References [ <a href="https://www.genome.jp">https://www.genome.jp</a> ]                                                    |
|----------------------------|--------------------------------------------------------------------------------------------------------------------------------------------------------------------------------------------------------|-----------------------------------------------------------------------------------------------------------------------------|
| Cell cycle                 | <i>CCND1, GSK3B, MYC, SMAD2, SMAD3, SMAD4, TGFB1, TGFB2, TGFB3, TP53</i>                                                                                                                               | <a href="https://www.genome.jp/pathway/hsa04110">https://www.genome.jp/pathway/hsa04110</a>                                 |
| p53 signaling pathway      | <i>BAX, BCL2, CASP3, CASP9, CCND1, CYCS, TP53</i>                                                                                                                                                      | <a href="https://www.genome.jp/pathway/hsa04115">https://www.genome.jp/pathway/hsa04115</a>                                 |
| Apoptosis                  | <i>AKT1, AKT2, AKT3, BAD, BAX, BCL2, BIRC5, CASP3, CASP9, CYCS, FOS, JUN, KRAS, MAP2K1, MAPK1, MAPK10, MAPK3, MAPK8, MAPK9, PIK3CA, PIK3CB, PIK3CD, PIK3R1, PIK3R2, PIK3R3, RAF1, TP53, DCC, APPL1</i> | <a href="https://www.genome.jp/pathway/hsa04210">https://www.genome.jp/pathway/hsa04210</a>                                 |
| mTOR signaling pathway     | <i>BRAF, GSK3B, KRAS, MAP2K1, MAPK1, PIK3CA, PIK3CB, PIK3CD, PIK3R1, PIK3R2, PIK3R3, RAF1, RHOA</i>                                                                                                    | <a href="https://www.genome.jp/pathway/hsa04150">https://www.genome.jp/pathway/hsa04150</a>                                 |
| PI3K-Akt signaling pathway | <i>AKT1, AKT2, AKT3, BAD, BCL2, CASP9, GSK3B, KRAS, MAP2K1, MAPK1, MAPK3, MYC, PIK3CA, PIK3CB, PIK3CD, PIK3CG, PIK3R1, PIK3R2, PIK3R3, PIK3R5, RAC1, RAF1, TP53</i>                                    | <a href="https://www.genome.jp/pathway/hsa04151">https://www.genome.jp/pathway/hsa04151</a>                                 |
| Wnt signaling pathway      | <i>APC, APC2, AXIN1, AXIN2, CCND1, CTNNB1, GSK3B, JUN, LEF1, MAPK10, MAPK8, MAPK9, MYC, RAC1, RAC2, RAC3, RHOA, SMAD3, SMAD4, TCF7, TCF7L1, TCF7L2, TP53</i>                                           | <a href="https://www.genome.jp/pathway/hsa04310">https://www.genome.jp/pathway/hsa04310</a>                                 |
| TGF-beta signaling pathway | <i>MAPK1, MAPK3, MYC, RHOA, SMAD2, SMAD3, SMAD4, TGFB1, TGFB2, TGFB3, TGFB1, TGFB2,</i>                                                                                                                | <a href="https://www.genome.jp/pathway/hsa04350">https://www.genome.jp/pathway/hsa04350</a>                                 |
| MAPK signaling pathway     | <i>AKT1, AKT2, AKT3, ARAF, BRAF, CASP3, FOS, JUN, KRAS, LEF1, MAP2K1, MAPK1, MAPK10, MAPK3, MAPK8, MAPK9, MYC, RAC1, RAC2, RAC3, RAF1, TGFB1, TGFB2, TGFB3, TGFB1, TGFB2, TP53</i>                     | <a href="https://www.genome.jp/pathway/hsa04010">https://www.genome.jp/pathway/hsa04010</a>                                 |
| ErbB signaling pathway     | <i>AKT1, AKT2, AKT3, ARAF, BAD, BRAF, GSK3B, JUN, KRAS, MAP2K1, MAPK1, MAPK10, MAPK3, MAPK8, MAPK9, MYC, PIK3CA, PIK3CB, PIK3CD, PIK3R1, PIK3R2, PIK3R3, RAF</i>                                       | <a href="https://www.genome.jp/pathway/hsa04012">https://www.genome.jp/pathway/hsa04012</a>                                 |
| MSI pathway                | <i>APC, AXIN1, AXIN2, BAD, BAX, BCL2, GSK3B, MLH1, MSH2, MSH3, MSH6, TGFB2</i>                                                                                                                         | <a href="https://www.genome.jp/dbget-bin/www_bget?path:map05210">https://www.genome.jp/dbget-bin/www_bget?path:map05210</a> |
| Ras signaling pathway      | <i>AKT1, AKT2, AKT3, BAD, KRAS, MAP2K1, MAPK1, MAPK10, MAPK3, MAPK8, MAPK9, PIK3CA, PIK3CB, PIK3CD, PIK3R1, PIK3R2, PIK3R3, RAC1, RAC2, RAC3, RAF1, RALGDS, RHOA</i>                                   | <a href="https://www.genome.jp/pathway/hsa04014">https://www.genome.jp/pathway/hsa04014</a>                                 |
